# Supplementary material for: High performance flexible multilevel optical memory based on a vertical organic field effect transistor with ultrashort channel length
Source: Royal Society of Chemistry journal article supplement (doi:10.1039/c9tc02385b), 2019-01-01
Supplement: c9tc02385b1.pdf [file c9tc02385b1.pdf]

## Supporting Information

### High Performance Multilevel Photonic Memory Based on Vertical Organic Filed Effect Transistor with Ultrashort Channel Length

Xiaomin Wu,<sup>§</sup> Shuqiong Lan,<sup>§</sup> Daobing Hu, Qizhen Chen, Enlong Li, Yujie Yan,

Huipeng Chen\* and Tailiang Guo

Institute of Optoelectronic Display, National & Local United Engineering Lab of Flat Panel Display Technology, Fuzhou University, Fuzhou 350002, China

Email: [hpchen@fzu.edu.cn](mailto:hpchen@fzu.edu.cn)

<sup>§</sup>These authors contributed equally to this work.

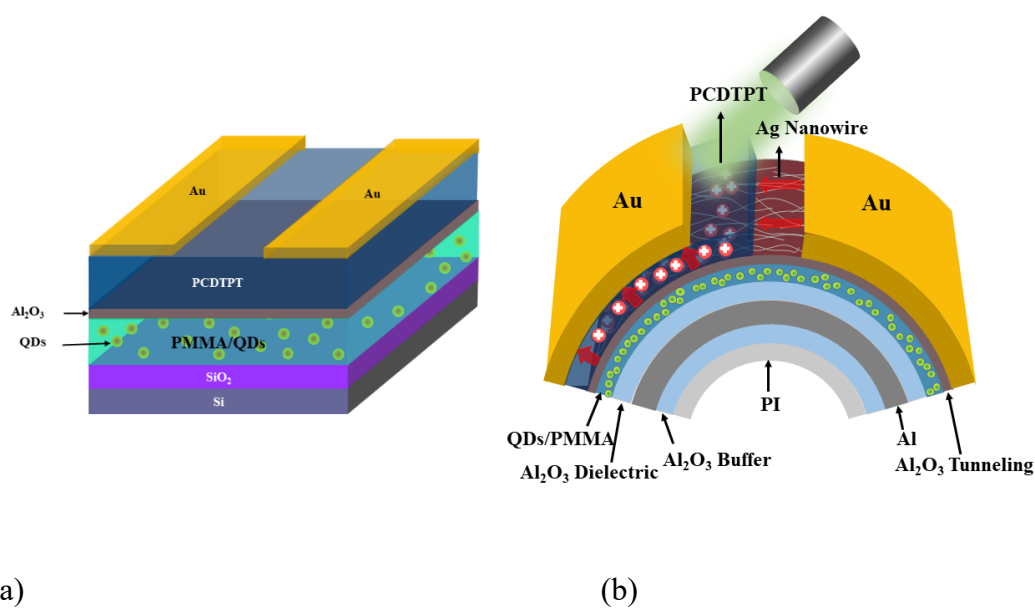

**Figure S1.** Schematic diagram of the (a) planar photo memory device and (b) flexible vertical memory device.

## **Device Fabrication**

### **Fabrication process of flexible vertical memory device**

For the preparation of flexible memory device, the glass was used as bottom substrate and PI solution was deposited onto the glass substrate by blade coating with a blade gap of 100 $\mu$ m. The substrate temperature and blade velocity were maintained at 50 °C and 10 mm/s. Subsequently the obtained film was annealed at 80 °C for 12 h, 120 °C for 1 h, 180 °C for 1 h, 250 °C for 1 h and 300 °C for 0.5 h inside a vacuum oven successively. Then 100 nm Al<sub>2</sub>O<sub>3</sub> was deposited on the top of PI as the buffer layer by ALD. The bottom Al gate electrode was prepared by thermal evaporation followed by deposition of 100 nm Al<sub>2</sub>O<sub>3</sub> as a blocking dielectric layer with the same ALD process conditions described above. The deposition of PMMA/QDs, Al<sub>2</sub>O<sub>3</sub> tunneling layer, AgNws, PCDTPT, and the source and drain electrodes were following the same process as the rigid device as mentioned above. Figure S2 showed the fabrication flow for a rigid multilevel non-volatile photo memory device.

### **Fabrication process of vertical optical memory array**

To obtain the regular memory array, PCDTPT (4mg/mL), which was dissolved in chloroform with 20 vol % 2-chlorophenol, were performed by inkjet-printing on a piezoelectric inkjet printing system (MicroFab, Jetlab II) with a nozzle diameter of 60  $\mu$ m. The volume, velocity, the substrate condition and angle deviation of in-flight drops were controlled by optical module. The deposition of the droplets was controlled by varying the driving voltage, printing speed, droplet size, and substrate temperature.

Driving voltage of 80 V and frequency of 1000 Hz with a 200 pL droplet size and substrate temperature at 60 °C was applied to obtain a uniform deposition of PCDTPT layer. The Ag ink droplet ejection was performed by a driving voltage of 40 V and a frequency of 1000 Hz with a 150 pL droplet size at room temperature.

### **Fabrication process of planar optical memory devices**

The structure of planar optical memory device was Si/SiO<sub>2</sub>/PMMA/QDs/PCDTPT/Au source–drain. A heavily p-doped Si with a 100 nm thick thermally grown SiO<sub>2</sub> was used as the gate electrode and blocking dielectric layer. Subsequently, the PMMA/QDs solution was spin-coated onto the SiO<sub>2</sub> blocking dielectric layer to form a charge-trapping layer. A 4 nm Al<sub>2</sub>O<sub>3</sub> tunneling layer was formed on the floating-gate layer by atomic layer deposition (ALD) under deposition temperature of 200°C. Drain and source electrodes were deposited by thermal evaporation through a shadow mask with channel length and width defined as 30 μm and 1000 μm, respectively.

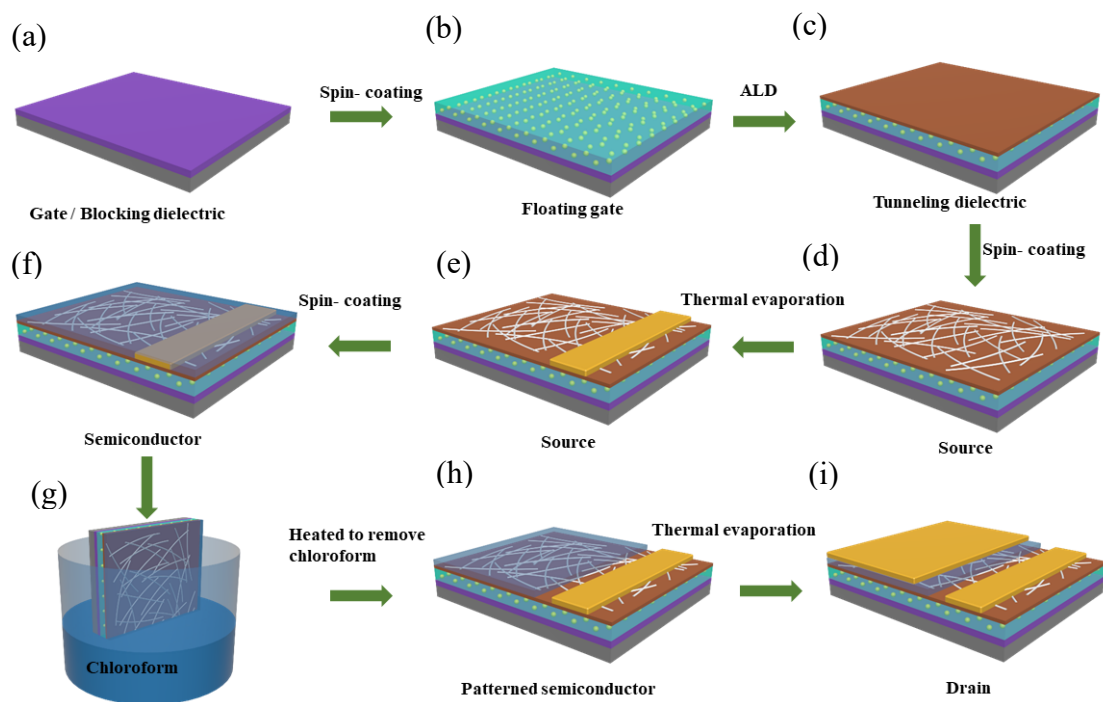

**Figure S2.** Schematic illustration of the fabrication flow for a rigid vertical photo memory device (a) and (b) spin coating of PMMA/QDs solution on the SiO<sub>2</sub>, (c) deposition of Al<sub>2</sub>O<sub>3</sub> tunneling layer by atomic layer deposition (ALD), (d) spin coating of AgNWs to form mesh source, (e) deposition of gold electrode by thermal evaporation using a sophisticated shadow mask, (f) spin coating of PCDTPT, (g) partially immersed the device in the chloroform solvent by a dip method to pattern organic semiconductor layer, (h) patterned organic semiconductor, (i) thermally evaporated gold as drain electrode.
